# Supplementary material for: Highly Efficient Targeted Mutagenesis of Drosophila with the CRISPR/Cas9 System
Source: PubMed Central journal article supplement — Cell Rep. 2013 Jul 11;4(1):220–8. doi: 10.1016/j.celrep.2013.06.020 (PMC3714591; doi:10.1016/j.celrep.2013.06.020), 2013-07-11
Supplement: mmc1.pdf [file mmc1.pdf]

**Table S1. Oligonucleotides Used in This Study, Related to Figure 1**

| Primer name | Sequence (5'-3')                                                                     |
|-------------|--------------------------------------------------------------------------------------|
| CRISPR_sgR  | AAAAGCACCGACTCGGTGCCACTTTTTCAAGTTGATAACGGACTAGCC<br>TTATTTTAACTTGCTATTTCTAGCTCTAAAAC |
| yCRISPR_1F  | GAAATTAATACGACTCACTATAGGTTTTGGACACTGGAACCGGTTTTA<br>GAGCTAGAAATAGC                   |
| yCRISPR_2F  | GAAATTAATACGACTCACTATAGGATGAGTGTGGTCGGCTGTGTTTTA<br>GAGCTAGAAATAGC                   |
| wCRISPR_1F  | GAAATTAATACGACTCACTATAGGCACAATATGGACATCTTTGTTTTA<br>GAGCTAGAAATAGC                   |
| wCRISPR_2F  | GAAATTAATACGACTCACTATAGGCGATACTTGGATGCCCTGGTTTTA<br>GAGCTAGAAATAGC                   |
| yHMA_F      | ATACAGCTGGAGATTGCGCCA                                                                |
| yHMA_R      | CCAGGTAGCTCGTATCTCCGAATT                                                             |
| w1HMA_F     | CAGAATAGTCCGCGTGTCCG                                                                 |
| w1HMA_R     | CCAAAACTACGGCACGCTCC                                                                 |
| w2HMA_F     | CATCCTGCTGGACATAGGCG                                                                 |
| w2HMA_R     | GAACTTTTGGCCGTGATGGG                                                                 |
| CG14073_F   | AGTCCGGCGCCCACACCTGT                                                                 |
| CG14073_R   | GGGCGCATTGTGTCACCGT                                                                  |
| H4r_F       | CGCTCTGCTCCCGCTGCTTC                                                                 |
| H4r_R       | CCATGTCACTCaCAGAAGAGGCC                                                              |
| CG43672_F   | TGCACCCTACTCGCGATGATTT                                                               |
| CG43672_R   | CGATCAGAGCTTCAGCCGATGTTTT                                                            |
| CG13397_F   | TGCAACTCGCGCAGGGATCA                                                                 |
| CG13397_R   | CGGCCATCATCCAACATGC                                                                  |
| Myo10A_F    | TGCGGGACTCTTCAATTGGCTGGT                                                             |
| Myo10A_R    | CGAAGCTGTTCTCCGCCAAATC                                                               |
| CG34422_F   | CAGAGCGCCCGCCAGCACAT                                                                 |
| CG34422_R   | CGCACGCCCGAAGAGTTGGT                                                                 |
| Fim_F       | GTGCACCAACTTCCAGTCGGAC                                                               |
| Fim_R       | TGCAACATGATCTCCGCGCG                                                                 |

Oligonucleotides used for the sgRNA template PCR (CRISPR\_F, CRISPR\_sgR) and HRMA analysis for each gene are indicated.
